# Supplementary material for: Surface modification of carbon dots via peptide covalent conjugation
Source: Royal Society of Chemistry journal article supplement (doi:10.1039/d2cc06478b), 2023-01-01
Supplement: d2cc06478b1.pdf [file d2cc06478b1.pdf]

## Electronic Supplementary Information (ESI)

# Surface modification of carbon dots via peptide Covalent Conjugation

Niladri Hazra, Soumyajit Hazra, Subir Paul and Arindam Banerjee \* [a]

[a] a School of Biological Science, Indian Association for the Cultivation of Science, Jadavpur, Kolkata-700 032, India.

E-mail: bcab@iacs.res.in

Number of pages: 19

Number of figs: 11

Number of tables: 2

## Table of Contents

|                                                           |           |
|-----------------------------------------------------------|-----------|
| 1. Experimental section.....                              | page 2-3  |
| 2. Preparation of GCD.....                                | page 4    |
| 3. Preparation of PCCD.....                               | page 4    |
| 4. Synthesis procedure of peptides.....                   | page 5-7  |
| 5. FT-IR spectra of the dipeptide (FF), PCCD and GCD..... | page 7    |
| 6. FT-IR assignments of GCD and FF.....                   | page 8    |
| 7. FEG-TEM and XPS of GCD.....                            | page 8    |
| 8. XPS of PCCD.....                                       | page 9    |
| 9. The XPS analysis of the PCCD and GCD.....              | page 9-10 |
| 10. NMR spectra of the (a) PCCD (b) GCD .....             | page 10   |
| 11. Zeta potential of GCD and PCCD.....                   | page 11   |

|                                                                   |            |
|-------------------------------------------------------------------|------------|
| 12. Optical spectra of GCD and PCCD.....                          | page 11    |
| 13. Aggregation study of PCCD by UV-vis spectroscopy.....         | page 12    |
| 14. Aggregation caused quenching of PCCD.....                     | page 12    |
| 15. TCSPC curve of the PCCD.....                                  | page 13    |
| 16. Life time of PCCD in organic solvents.....                    | page 13    |
| 17. I-V measurements of the GCD.....                              | page 14    |
| 18. Tauc's plot of the GCD and the PCCD.....                      | page 14    |
| 19. Hydrodynamic diameter of the GCD and PCCD.....                | page15     |
| 20. Change in FTIR spectra of PCCD in aggregated state.....       | page 15    |
| 20. XRD spectra of the aggregated PCCD .....                      | Page 15    |
| 21. TLC of PCCD.....                                              | page 16    |
| 22. Real image of the GDC and PCCD.....                           | page 16    |
| 23. Sample preparation for I-V and photocurrent measurements..... | page 17    |
| 24. HRMS and NMR spectrum of the peptides.....                    | page 17-19 |

## **Experimental section**

### **Materials**

2,3-Dichloro-5,6-dicyano-benzoquinone (DDQ), ortho-xylene, L-phenylalanine, DCC, hydroxy benzotriazole (HOBt), Di-tert-butyl decarbonate (BOC anhydride), NaOH pellets DMF, Ethyl Acetate, formic acid, chloroform, methanol, DMSO, MeCN, pet ether, silica gel (100–200 mesh), were purchased from SRL, India. The water used in all experiments was Millipore Milli-Q grade.

### **UV-vis spectroscopic analysis**

A Cary Varian 50 scan UV-visible optical spectrophotometer equipped with 'Cary Win' UV software was used to investigate the optical properties of C-dots in different solvents.

### **Fluorescence spectroscopy**

Fluorescence studies of CDs in a sealed cuvette were carried out in a PerkinElmer LS55 Fluorescence Spectrometer instrument. All experiments were carried out with an excitation slit width of 5 nm and emission slit width of 5 nm.

### **FEG-TEM study**

TEM studies of C-dots in different solvents were carried out on a JEOL 2100 keV Ultra High-Resolution Field Emission Gun (UHR-FEG) TEM instrument with a voltage of 200 keV using carbon coated copper grids.

### **X-ray photoelectron spectroscopic (XPS) study**

XPS analysis of C-dots was carried out by using the X-ray photoelectron spectroscopy (XPS, Omicron, model: 1712-62-11) method. Measurement was done by using an Al-K $\alpha$  radiation source under 15 kV voltages and 5 mA current.

### **Fourier transform infrared (FTIR) study**

FT-IR spectra were recorded by using the KBr pellet technique in a Nicolet 380 FT-IR spectrometer (Thermo Scientific).

### **Time-correlated single-photon counting methodology (TCSPC) study**

TCSPC measurements were done by Horiba join Yvon IBH instruments having an MCP-PMT Hamamatsu R3809 detector

### **I–V Measurements**

For I–V measurements, the DC currents were measured using a Keithley source meter (model 2410). The dark I–V characteristics were measured after keeping the samples in vacuum for 24 h. For photocurrent transient measurement, a xenon light source (model no. 66902; Newport Corp.) with a power of 1 sun was used for the light illumination.

### **Preparation of GCD**

GCD was synthesized from DDQ by the solvothermal approach. At first, the 50 mg of DDQ were taken in a 100 ml beaker and 50 ml of ortho-xylene was added followed by a few minutes sonication to make a homogeneous dark red solution. Then the solution was transferred into the Teflon-lined autoclave and heated at 180 °C for 5 hours in an oven. After that the autoclave was settled to cool down and impure GCD were taken out from the auto-clave. Then the solvent was evaporated from the reaction mixture using a vacuum oven at 90 °C for 3 hours to get dry carbon dot. These GCDs were dispersed into the milli-Q water and centrifuged for 10 minutes in 5000 rpm. Then the supernatant was dried to get green flourishing carbon dot.

### **Preparation and Purification of the PCCD**

At first 1 mg of GCD is dissolved into the 100 ml ethyl acetate solvent in a 250 ml rotary bottle followed by 10-minute sonication to make a clear dark brown solution. Then 5 milli mole (1.6 mg) of freshly prepared di-peptide  $\text{NH}_2\text{-Phe(L)-Phe(L)-OMe}$  (FF) is added into the solution along

with few drops of DMF. The solution is again sonicated for few minutes and then 5 milli mole (0.675mg) of o 1-hydroxy benzotriazole (HOBT) and 5 milli mole (1.03mg) of N, N di cyclohexyl carbodiimide (DCC) are added in consecutive order. Then whole reaction mixture was allowed to stir under the magnetic rotter for 2 days. Then the reaction mixture was diluted by ethyl acetate and filtered to separate N, N- dicyclohexyl urea (DCU). After that the filtrate was washed by the brine water (2x30 ml) and the organic part was dried over sodium sulphate and solvent was evaporated. The formation of the red PCCD was confirmed by the TLC in the MeOH/CHCl<sub>3</sub> (fig S15). The crude mixture ware then purified by the silica gel column chromatography using MeOH/CHCl<sub>3</sub> to get the pure product. The Schematic illustration of the synthesis rout of the PCCD is provided in (Scheme 1).

#### **Synthesis Procedure of BocNH-Phe-COOH**

1.65 g (10 mmol) of L-Phenylalanine (Phe) was taken in a 250 ml round bottom flask. 10 ml 1(N) NaOH and 20 ml dioxane was added to it and cooled to 0°C. 2.20 g (10.1mmol) di-tert-butyl dicarbonate (Boc anhydride) was added to the reaction mixture and stirred for 8 hours at room temperature. Then dioxane was removed by reduced pressure. The resulting mixture was acidified with saturated KHSO<sub>4</sub> solution and the aqueous layer was extracted with ethyl acetate (3 x 50 mL). The ethyl acetate extract was dried over anhydrous sodium sulfite and evaporated in vacuum to obtain the colorless sticky product

Yield: 9.1 (mmol) ,91%

#### **Synthesis Procedure of BocNH-Phe-Phe-COOMe**

2.38 g (9 mmol) Boc NH-Phe-OH was dissolved in 10 ml dry N, N-dimethyl formamide (DMF) and cooled in an ice bath. H<sub>2</sub>N-Phe-OMe (9 mmol) was obtained by neutralization with saturated Na<sub>2</sub>CO<sub>3</sub> from its hydrochloride salt and subsequent extraction with ethyl acetate. The ethyl acetate solution was then concentrated to 20 ml and added to the DMF solution followed by 1.35 g (10 mmol) of HOBt and 2.06 g (10 mmol) of N, N-cyclohexyl carbodiimide (DCC). The reaction mixture was allowed to come to room temperature and stirred for 24 hr. The reaction mixture was diluted with ethyl acetate and filtered to separate N,N-dicyclohexyl urea (DCU). The ethyl acetate layer was washed with brine (2 × 30 ml). The organic layer was dried over anhydrous sodium sulfate and evaporated to obtain the yellowish product. The product was purified through silica gel column chromatography using ethyl acetate: n-hexane (10-90) as eluent to obtain the pure product.

Yield: 7.2 (mmol), 80 %

<sup>1</sup>H NMR (500 MHz, CDCl<sub>3</sub>), 25 °C: δ 7.33–7.212 (5H, aromatic Hs, m), 7.020–7.002 (1H, NH, br), 6.318–6.303 (1H, NH, br), 4.973 (1H, αH, br), 4.821–4.806 (1H, αH, br), 3.69 (3H, OCH<sub>3</sub>), 3.129–3.025 (4H, βCH<sub>2</sub>, m), 1.430 (9H, Boc, s), HRMS (m/z) Calculated : 427, HRMS (m/z) found: 427.18 [M]<sup>+</sup>.

#### **Synthesis Procedure of NH<sub>2</sub>-Phe-Phe-COOMe (FF)**

2.9 g (7 mmol) Boc-NH-Phe-Phe-COOMe and 5 ml of 98% formic acid was added and the removal of the Boc group was monitored by TLC. After 7 hours, formic acid was removed under a vacuum. The residue was taken in water (8 ml) and pH of the aqueous solution was then adjusted to 8.0 with 30% aqueous NH<sub>3</sub>. The aqueous portion was evaporated in a vacuum. A

white material was obtained, purified using basic alumina in chloroform and methanol (9:1) as eluent.

Yield: 4 (mmol), 57 %

$^1\text{H}$  NMR (500 MHz, ( $\text{DMSO-d}_6$ ), 25 °C):  $\delta$ 8.4 (1H, NH, br) 7.299-7.191 (5H, aromatic Hs, m), 3.969

(3H, OCH<sub>3</sub>) 3.380 (1H,  $\alpha$ H, m), 2.825-2.730 (2H,  $\beta$ H, m), 2.249-2.200 (1H,  $\beta$ CH<sub>2</sub>, m), HRMS

( $m/z$ ) Calculated 327[M]<sup>+</sup> HRMS ( $m/z$ ) found: 327.13 [M]<sup>+</sup>.

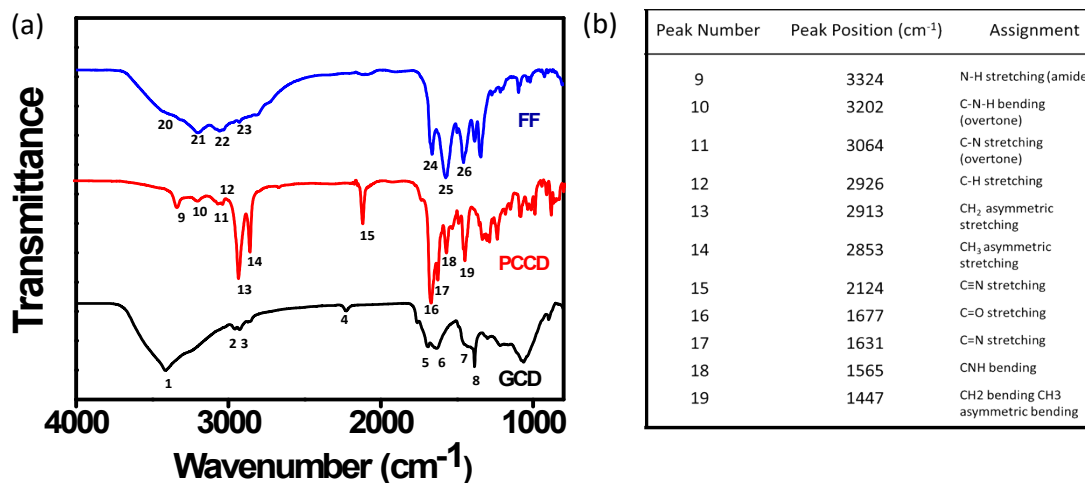

**Fig. S1** (a) the FT-IR spectra of the dipeptide (FF), PCCD and GCD. (b) assignments of peaks of PCCD.

### Assignments of GCD

| Peak Number | Peak Position (cm <sup>-1</sup> ) | Assignment                            |
|-------------|-----------------------------------|---------------------------------------|
| 1           | 3412                              | O-H stretching                        |
| 2           | 2960                              | C-H stretching                        |
| 3           | 2930                              | CH <sub>2</sub> Asymmetric stretching |
| 4           | 2228                              | C≡N stretching                        |
| 5           | 1686                              | C=O stretching                        |
| 6           | 1638                              | C=C stretching                        |
| 7           | 1368                              | O-H deformation                       |

### Assignments of FF

| Peak Number | Peak Position (cm <sup>-1</sup> ) | Assignment                                          |
|-------------|-----------------------------------|-----------------------------------------------------|
| 20          | 3419                              | N-H stretching of NH <sub>2</sub>                   |
| 21          | 3203                              | N-H stretching of amide                             |
| 22          | 3058                              | C-N stretching                                      |
| 23          | 2926                              | CH <sub>2</sub> stretching                          |
| 24          | 1662                              | C=O stretching                                      |
| 25          | 1571                              | CNH bending                                         |
| 26          | 1456                              | CH <sub>2</sub> bending and CH <sub>3</sub> bending |

**Table S1.** FT-IR assignments of GCD and FF

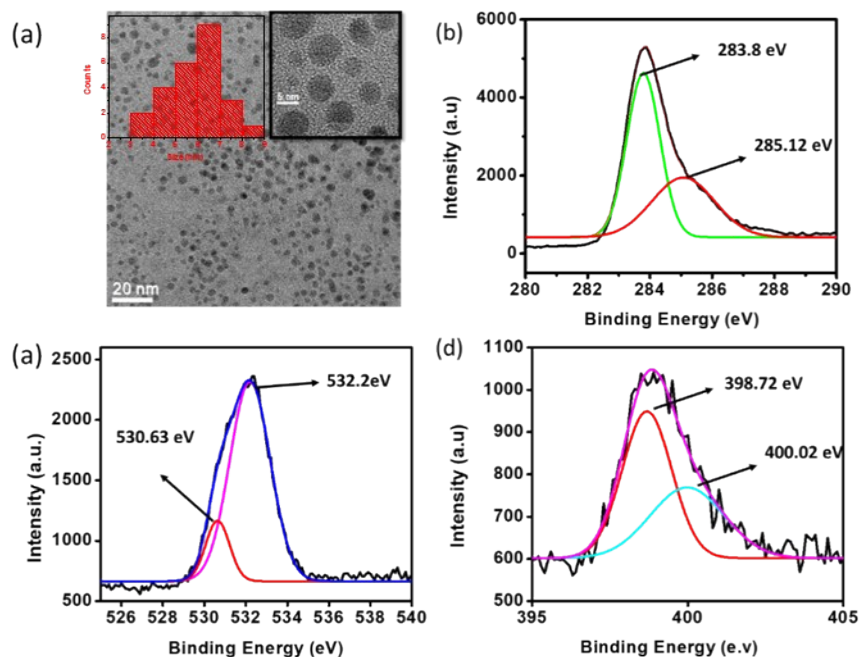

**Fig. S2**(a) FEG-TEM images of the GCD in water (inset, left- size distribution of the GCD right- close snap of GCD) (b) C1S (b) O1S (c) N1S spectra of the GCD.



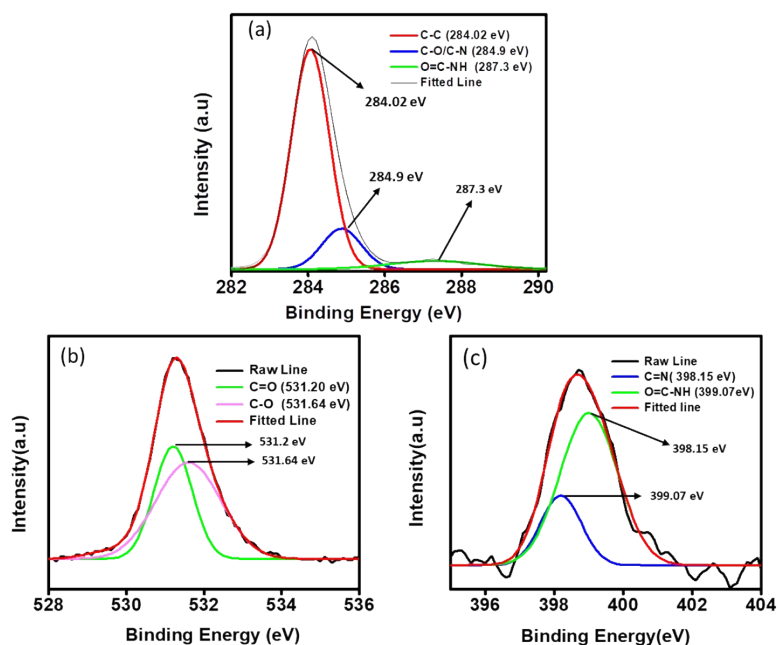

**Fig. S3** XPS spectra of the (a) C 1s (b) O 1s (c) N 1s of the PCCD

### XPS analysis:

X-ray photoelectron spectroscopic (XPS) analyses of the PCCDs and GCDs were also carried out. The C 1s region of the high-resolution spectrum of the PCCDs (Fig. S3a,) showed C–C (284.02 eV), C–O/C–N (284.9 eV) and O=C–NH (287.3 eV) signals. In the C 1s region of the spectrum of the GCDs, peaks were observed at 283.8 eV and 285.2 eV, which represented the C–C and C–O/C–N bonds, but no peak at 287– 288 eV was found in this spectrum (Fig. S2b,)<sup>1</sup>, which confirmed the appearance of the amide bonds in the PCCDs after the surface modification of the GCDs by the FF dipeptide. Furthermore, the O 1s region of the high-resolution spectrum

of PCCDs showed C=O (531.2 eV) and C–O (531.64 eV) signals(Fig. S2b,). The N 1s region showed C=N (398.15 eV) andO=C=NH (399.09 eV) signals,<sup>2</sup> providing further evidencefor the presence of amide bonds in the PCCDs (Fig. S2c,).The XPS spectra of the GCDs are shown in Supporting Information(Fig. S2,).

#### References:

1. H. Wang, T. Zhang, J. Zhu, Y. Zhai, H. Wang, X. Bai, B. Dong and H. Song, *Nanoscale*, 2017, **9**, 13042–13051.
2. K. Jiang, S. Sun, L. Zhang, Y. Lu, A. Wu, C. Cai and H. Lin, *Angew. Chemie- Int. Ed.*, 2015, **54**, 5360–536

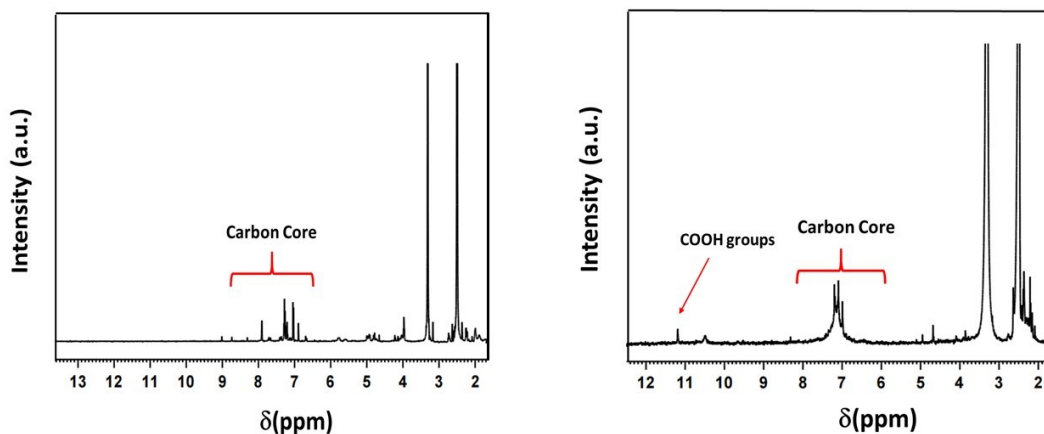

**Fig. S4:** NMR spectra of the (a) PCCD (b) GCD.

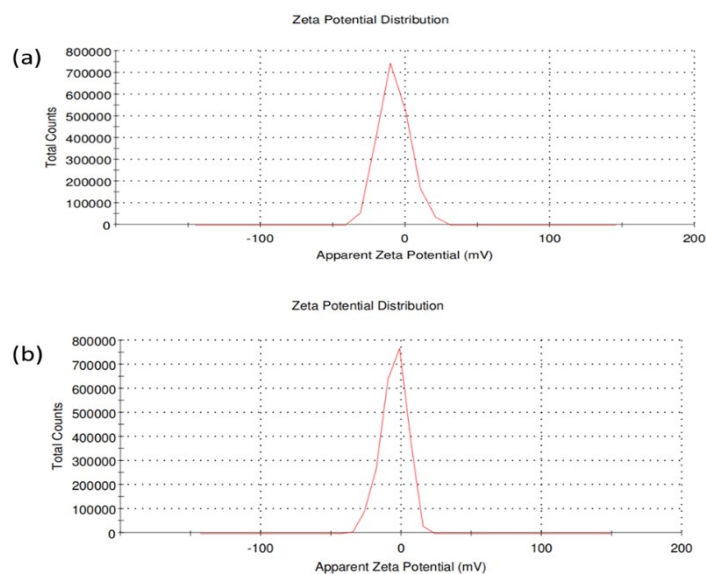

**Fig. S5** The DLS analysis of the (a) GCD (b) PCCD

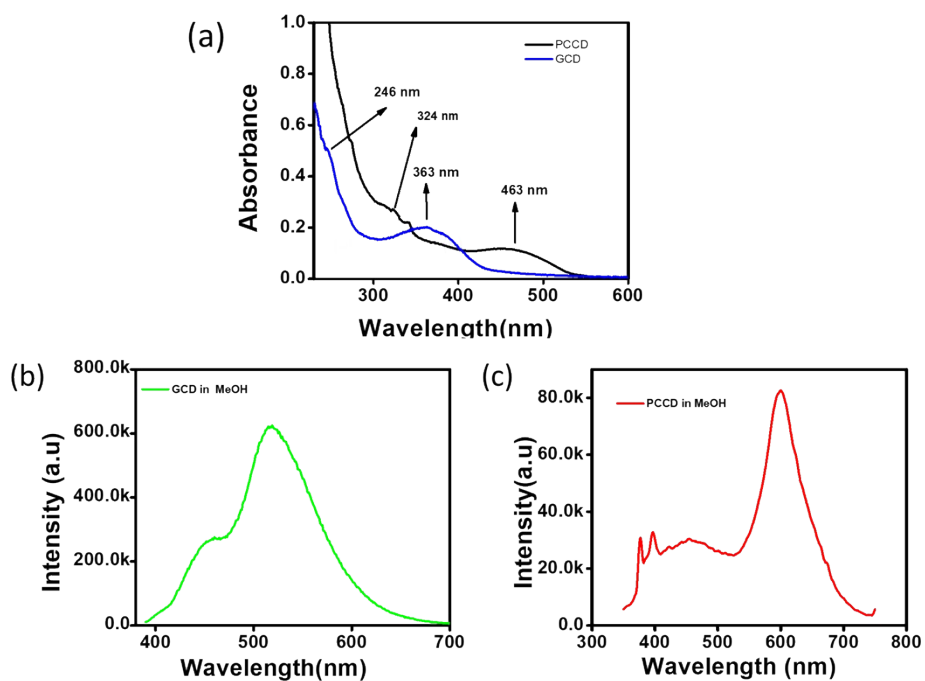

**Fig. S6** (a) The UV-visible spectroscopy of GCD and PCCD in methanol. PL (photo luminance) spectra of (b) GCD (c) PCCD in MeOH.

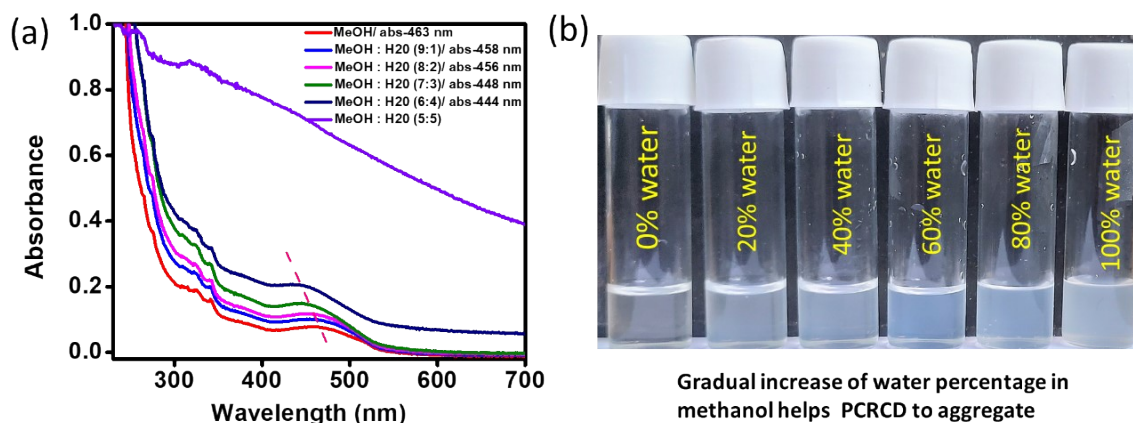

**Fig. S7** (a) The blue shift of UV- vis spectra of the PCRDC in the different ratio between MeOH and water, represents H type aggregation (b) Change of color from clear to viscous upon increasing of aggregation solvent (water) under day light.

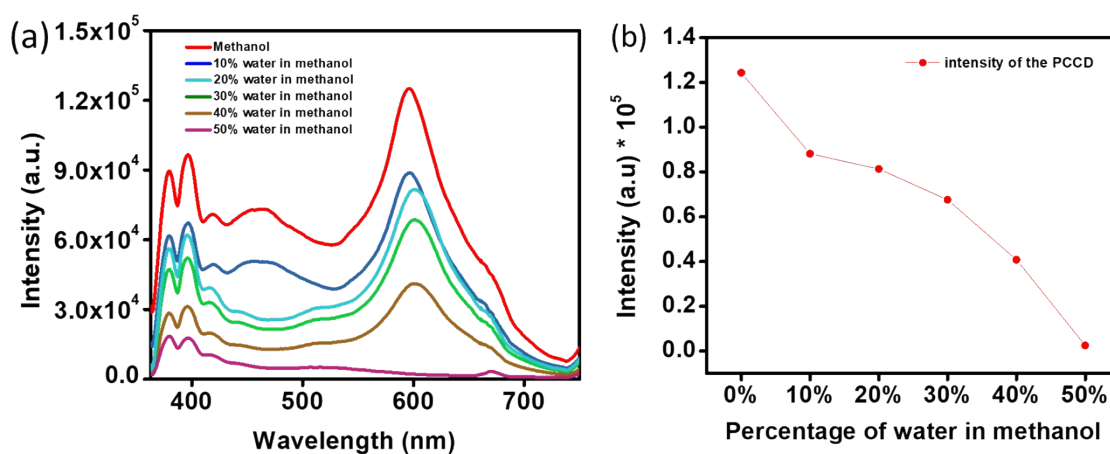

**Fig. S8**(a) The steady quenching of fluorescence of PCCD with the increasing of water percentage in MeOH. (b) Decay plot of intensity of fluorescence of PCCD with water percentile in MeOH (inset: the aggregation caused quenching photograph).

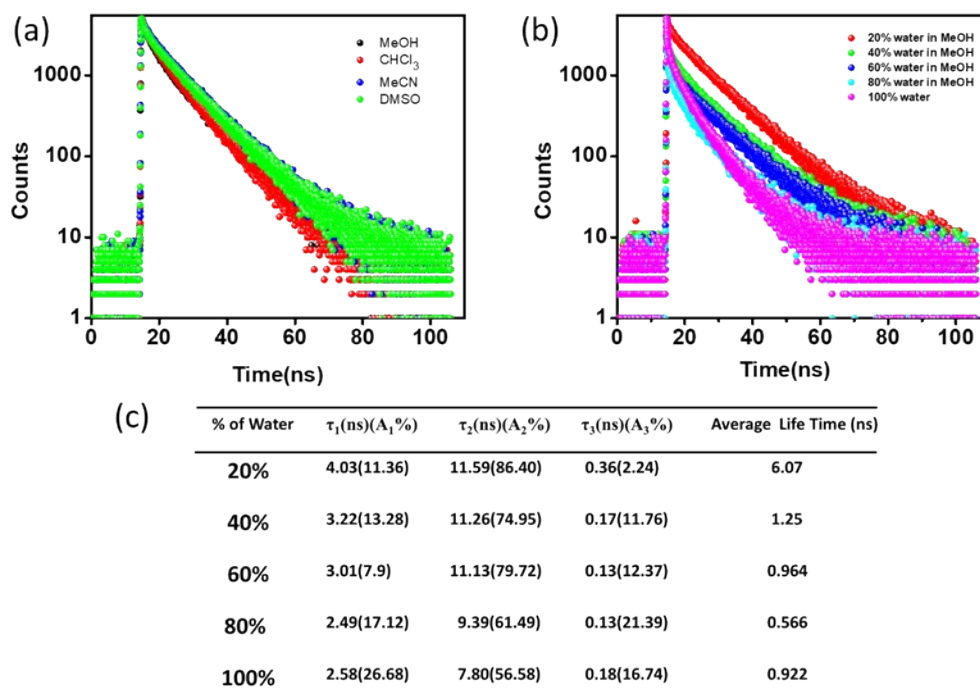

**Fig. S9** TCSPC curve of the PCCD (a) in different organic solvent (b) in methanol increasing water percentile with the gradual increasing order (c) the change of the average life time of PCCD with the increasing water in MeOH.

| solvent           | $\tau_1$ (ns)(A <sub>1</sub> %) | $\tau_2$ (ns)(A <sub>2</sub> %) | Average Life Time (ns) |
|-------------------|---------------------------------|---------------------------------|------------------------|
| MeOH              | 2.55(25.5)                      | 10.14(74.5)                     | 5.77                   |
| CHCl <sub>3</sub> | 2.38(17.72)                     | 8.75(82.28)                     | 5.9                    |
| MeCN              | 2.14(9.64)                      | 9.93(90.36)                     | 7.46                   |
| DMSO              | 1.14(7.89)                      | 9.72(92.11)                     | 6.64                   |

**Table S2.** The life time PCCD in different organic solvents.

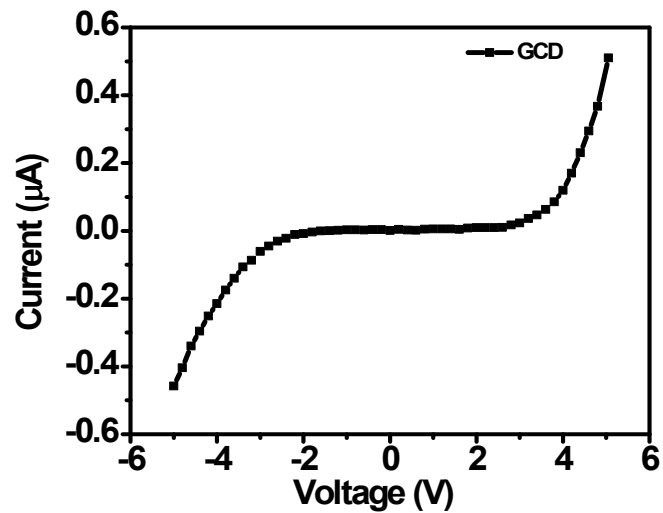

Fig. S10 I-V measurements of the GCD

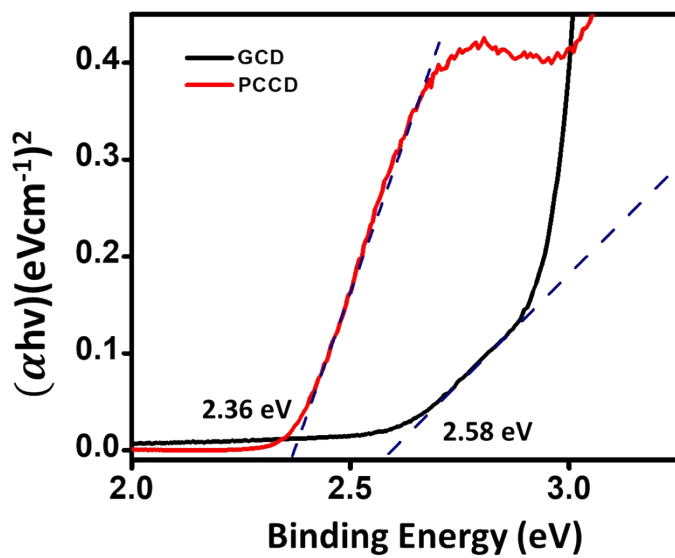

Fig. S11 Tauc's plot of the GCD and the PCCD

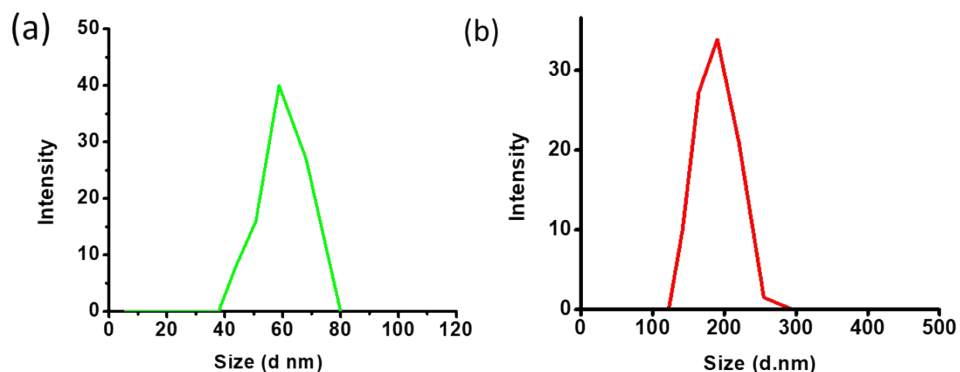

**Fig. S12** Hydrodynamic diameters of the GCD and PCCD

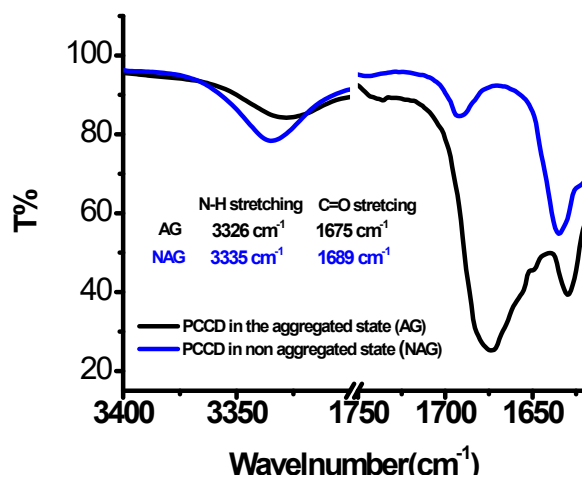

**Fig. S13** the change of FTIR after the aggregation state

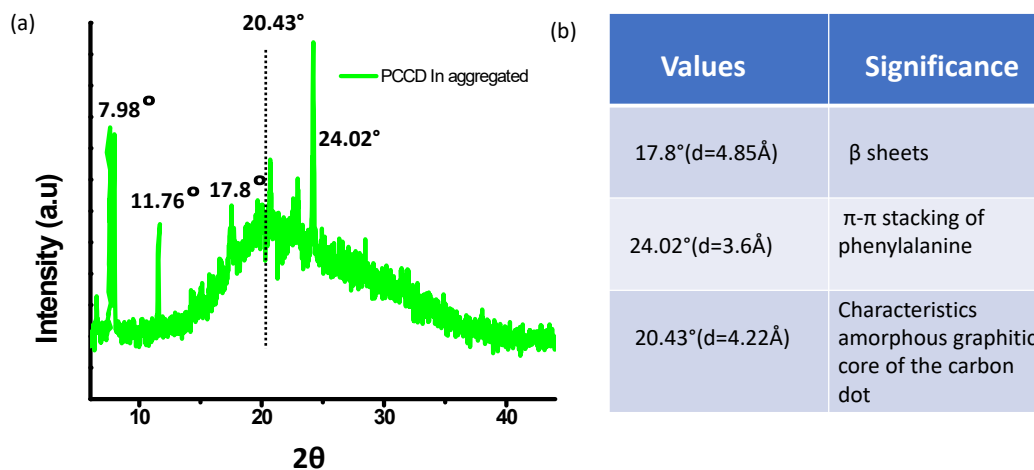

**Fig S14.** (a) XRD spectra of the aggregated PCCD (b) significance of peaks

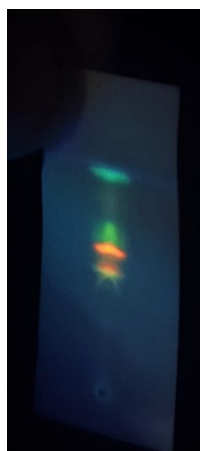

**Fig. S15**TLC of PCCD in the 3% MeOH/CHCl<sub>3</sub>.

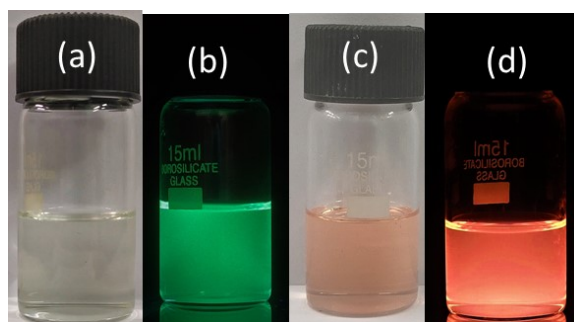

**Fig. S16** (a and b) Photographs of GCDs in methanol (a) in daylight and (b) under UV light. (c and d) Photographs of PCCDs in methanol (c) in daylight and (d) under UV light.



### Sample preparation for IV and photocurrent measurements:

To perform the current–voltage (I–V) and photocurrent studies in both states (aggregated and non-aggregated), we dissolved the PCCDs in methanol and dispersed the resulting solution in a water medium. In the methanol and water, the PCCDs remained in the non-aggregated and aggregated states, respectively, so we drop-cast PCCDs from those solutions onto two separate washed and cleaned ITO glasses. After the dropcasting, the two ITO glasses were sandwiched with each other and kept together using a crocodile clip. Then they were kept under a vacuum atmosphere for 24 hours to mitigate any effects of moisture as even small amounts of moisture can

desirable

defect sites

many

Then with

experiments

inhibit achieving the conductivity by creating as CD surfaces contain oxygen-containing groups. dry ITOs the final have been performed.

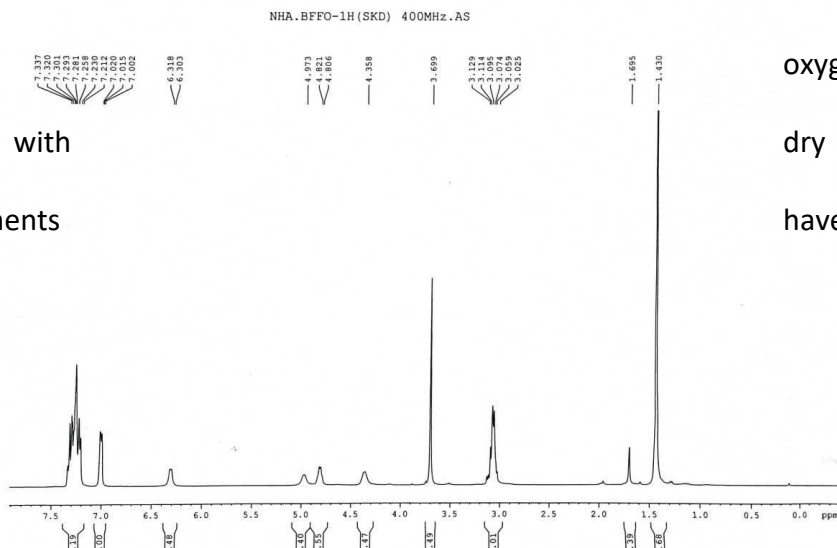

# NMR spectrum of Boc-NH-Phe-Phe-OMe

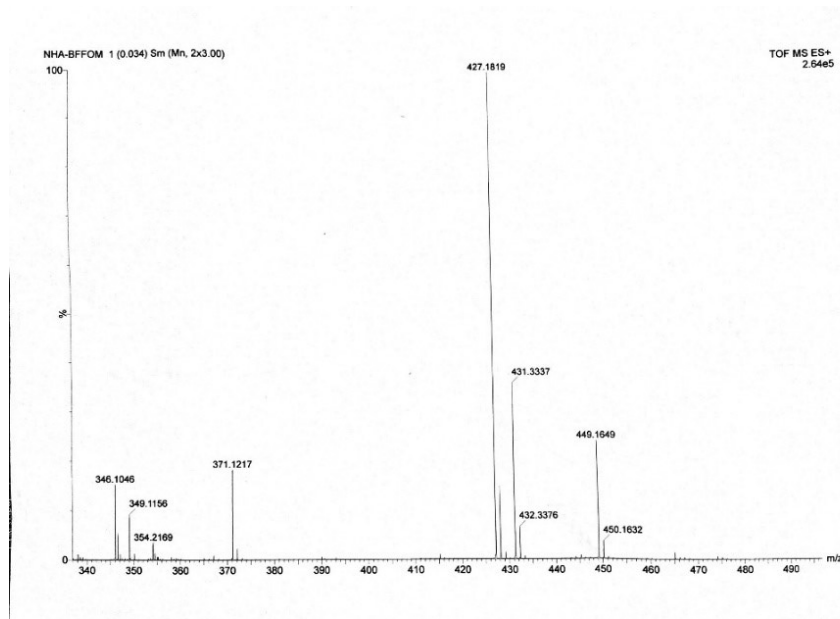

# HRMS spectrum of Boc-NH-Phe-Phe-OMe

# Boc-NH-Phe-Phe-OMe

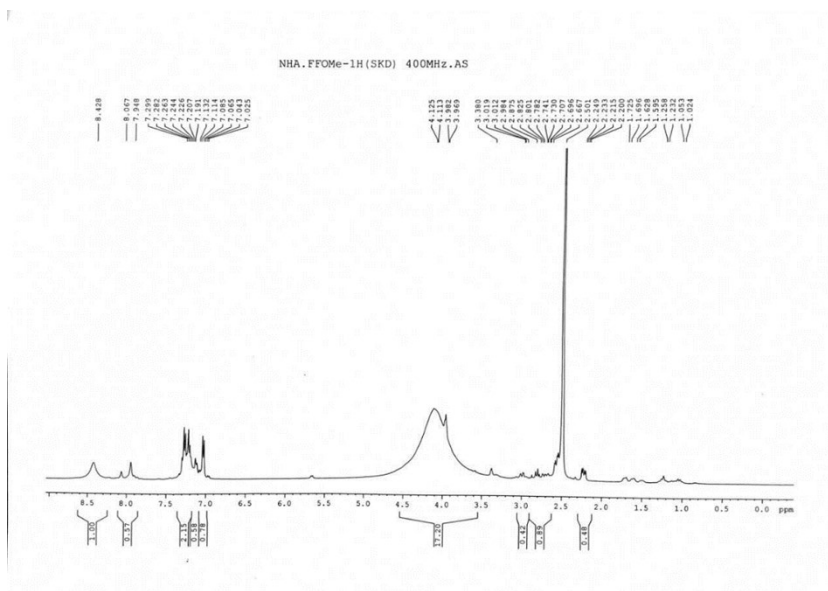

NMR spectrum of NH<sub>2</sub>-Phe-Phe-OMe

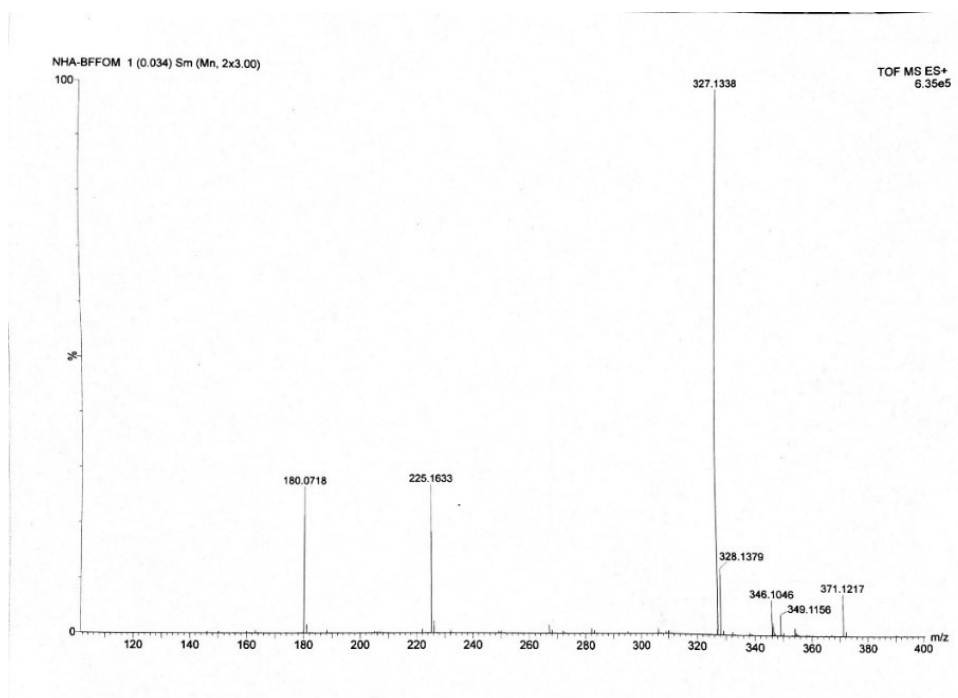

HRMS spectrum of NH<sub>2</sub>-Phe-Phe-OMe
